1

2

3 **Structures of TOG1 and TOG2 From the Human Microtubule Dynamics Regulator**

4

**CLASP1**

5

Jonathan B. Leano<sup>1,2</sup>, Kevin C. Slep<sup>2,3\*</sup>

6

7

8 **1** Department of Biochemistry & Biophysics, University of North Carolina, Chapel Hill,

9 North Carolina, 27599, United States of America

10 **2** Program in Molecular and Cellular Biophysics, University of North Carolina, Chapel

11 Hill, North Carolina, 27599, United States of America

12 **3** Department of Biology, University of North Carolina, Campus Box 3280, Chapel Hill,

13 North Carolina, 27599, United States of America

14

15 □ Current address: Department of Biochemistry and Biophysics, University of California,

16 San Francisco, California, 94143, United States of America

17 \* [kslep@bio.unc.edu](mailto:kslep@bio.unc.edu)

18

19 Running Title: Structures of CLASP1 TOG1 and TOG2

## Structures of CLASP1 TOG1 and TOG2

### 20 **Abstract**

21

22 Tubulin-binding TOG domains are found arrayed in a number of proteins that regulate  
23 microtubule dynamics. While much is known about the structure and function of TOG  
24 domains in the XMAP215 microtubule polymerase family, less is known about the TOG  
25 domain array found in the CLASP family. The CLASP TOG array promotes microtubule  
26 pause, potentiates rescue, and limits catastrophe. How distinct the TOG domains of  
27 CLASP are from one another, from XMAP215 TOG domains, and whether they are  
28 positionally conserved across CLASP family members is poorly understood. We present  
29 the x-ray crystal structures of human CLASP1 TOG1 and TOG2. The structures of  
30 CLASP1 TOG1 and TOG2 are distinct from each other, from CLASP TOG3, and are  
31 positionally conserved across species. While studies have failed to detect CLASP TOG1  
32 tubulin-binding activity, TOG1 is structurally similar to the free-tubulin binding TOG  
33 domains of XMAP215. In contrast, though CLASP TOG2 and TOG3 have tubulin  
34 binding activity, they are structurally distinct from the free-tubulin binding TOG domains  
35 of XMAP215. CLASP TOG2 has a convex architecture, predicted to engage a hyper-  
36 curved tubulin state. CLASP TOG3 has unique structural elements in the C-terminal half  
37 of its  $\alpha$ -solenoid domain that modeling studies implicate in binding to laterally-associated  
38 tubulin subunits in the microtubule lattice in a mode similar to, yet distinct from  
39 XMAP215 TOG4. These findings highlight the structural diversity of TOG domains  
40 within the CLASP TOG array and provide a molecular foundation for understanding  
41 CLASP-dependent effects on microtubule dynamics.

42 **Introduction**

43

44 Microtubules are highly dynamic, polarized eukaryotic cellular polymers [1–4].

45 Microtubules are composed of  $\alpha\beta$ -tubulin heterodimers that polymerize through lateral

46 and longitudinal associations to form a cylindrical, polarized lattice with  $\alpha$ -tubulin and  $\beta$ -

47 tubulin exposed the microtubule minus and plus end respectively. Microtubule dynamics

48 occur at both the plus and minus ends, but are primarily focused at the plus end. During

49 phases of polymerization, tubulin heterodimers with GTP bound at the exchangeable site

50 on  $\beta$ -tubulin incorporate into the lattice and define the “GTP cap”. Once incorporated into

51 the lattice, the GTP in the exchangeable site is hydrolyzed to GDP. It is the structural

52 transition of tubulin subunits in the microtubule lattice from a GTP-bound state to a

53 GDP-bound state that underlies the polymer’s dynamic instability. Collectively, dynamic

54 instability includes phases of polymerization, depolymerization, and pause, with the

55 transition to depolymerization termed catastrophe, and the transition out of

56 depolymerization termed rescue. While dynamic instability is inherent to microtubules it

57 is highly regulated in space and time by a host of microtubule associated proteins

58 (MAPs). A key subset of MAPs include microtubule plus end binding proteins that

59 localize to polymerizing microtubule plus ends [5–8].

60

61 Many microtubule plus end binding proteins form a complex network of

62 interactions both with each other and the microtubule polymer. A master plus end binding

63 protein family is the end binding (EB) protein family (EB1, EB2, and EB3) that

64 preferentially binds the post-hydrolysis  $\text{GDP}\text{P}_i$  microtubule state, best-mimicked by

## Structures of CLASP1 TOG1 and TOG2

65 GTP $\gamma$ S-bound microtubules [9]. EB members use a dimerization domain to recruit SxIP  
66 or LxxPTPh motif-containing proteins to the microtubule plus end [7,10–12]. Two prime  
67 factors that bind tubulin and are recruited to microtubule plus ends by EB1 (either  
68 directly or indirectly) are Cytosolic Linker-Associated Protein (CLASP) and ch-TOG  
69 [13–17]. Both ch-TOG and CLASP are critical for proper interphase microtubule  
70 dynamics as well as mitotic spindle structure and dynamics [13,18–20]. While ch-TOG  
71 promotes microtubule polymerization, CLASP promotes microtubule pause and rescue  
72 and limits catastrophe [13,21–26]. Mutations in CLASP family members result in  
73 aberrant microtubule dynamics that manifest in phenotypes ranging from abnormal  
74 mitotic spindle structure to defects in axon guidance [20,27–29]. How CLASP and ch-  
75 TOG mechanistically regulate microtubule dynamics is poorly understood.

76

77 While ch-TOG and CLASP differentially affect microtubule dynamics, they both  
78 employ an array of tubulin-binding TOG domains to regulate the microtubule polymer  
79 [13,19,30,31]. TOG domain structures were first determined from ch-TOG family  
80 members, revealing a 220-250 residue  $\alpha$ -solenoid comprising six HEAT repeats (HRs) (A  
81 through F) that form a paddle-like structure [30,32]. The intra-HEAT loops that line one  
82 face of the TOG domain are highly conserved and are used to engage the tubulin  
83 heterodimer [30,32]. Structural work involving TOG1 and TOG2 from the  
84 *Saccharomyces cerevisiae* ch-TOG family member Stu2 demonstrated that TOG domain  
85 HRs A-D and HRs E-F engage regions of  $\beta$ - and  $\alpha$ -tubulin respectively that are exposed  
86 on the cytosolic surface of the microtubule [33,34]. Elucidating the structural  
87 determinants that underlie ch-TOG family TOG architecture led to the prediction and

## Structures of CLASP1 TOG1 and TOG2

88 subsequent confirmation that CLASP also contains an array of cryptic TOG domains that  
89 underlies its regulatory action on microtubule dynamics [30,31]. While human ch-TOG  
90 contains an N-terminal pentameric TOG domain array, CLASP1 contains three TOG  
91 domains (TOG1-3) followed by a C-terminal CLIP-170 interaction domain (CLIP-ID)  
92 (Fig 1A) [13,19,35]. TOG structures determined to date from ch-TOG and CLASP family  
93 members show dramatically different curvatures along the TOG domain's  $\alpha$ -solenoid axis  
94 that predict distinct interactions with tubulin [22,23,30–39]. Of note, the structure of  
95 CLASP1 TOG2 revealed a unique bent architecture that would require a significant  
96 conformational change in either the TOG domain and/or tubulin to enable each  
97 component to fully engage [31]. While TOG domains have diverse architectures,  
98 structural data collected to date indicates that distinct architectures are conserved within  
99 an array and play position-specific roles in the regulation of microtubule dynamics [35].  
100 This has led to the hypothesis that ch-TOG and CLASP families use a common TOG  
101 array-based paradigm to regulate microtubule dynamics, but employ distinct TOG  
102 architectures along their respective arrays to differentially regulate the polymer's  
103 dynamics.

104

105 Structural studies of CLASP family members to date have presented the structures  
106 of *Drosophila melanogaster* MAST TOG1, human CLASP2 TOG1, CLASP1 TOG2,  
107 CLASP2 TOG2, *S. cerevisiae* Stu1 TOG2, and mouse CLASP2 TOG3 [22,23,31,38,39].  
108 *D. melanogaster* MAST TOG1 has a flat TOG architecture similar to Stu2 TOG1 [38].  
109 Structures of human TOG2 from CLASP1 and CLASP2 are similar to one another and  
110 exhibit the bent architecture described above [31,39]. The structure of mouse CLASP2

## Structures of CLASP1 TOG1 and TOG2

111 TOG3 reveals a bent architecture, albeit not in the plane observed in CLASP TOG2, but  
112 perpendicular to this, such that the TOG3 HR D-F triad likely engages unique  
113 determinants on  $\alpha$ -tubulin [39]. A similar, yet distinct, orthogonally bent architecture was  
114 observed in structures of TOG4 from ch-TOG family members [36]. These structural  
115 findings indicate that TOG domains in the CLASP family array each have distinct  
116 architectures and likely play distinct roles in tubulin-binding, microtubule affinity, and  
117 effects on microtubule dynamic instability. In support, recent studies of CLASP family  
118 members have implicated CLASP TOG2 as necessary and sufficient to limit microtubule  
119 catastrophe, and ascribes microtubule rescue activity to TOG3 [22,23]. While significant  
120 gains have been made in elucidating CLASP TOG structures, additional TOG structures  
121 from distinct family members are required to determine if these distinct TOG domain  
122 architectures are positionally conserved along the array.

123

124 Here we structurally characterize the first two TOG domains of human CLASP1.  
125 We present the X-ray crystal structure of CLASP1 TOG1 as well as a high-resolution  
126 structure of CLASP1 TOG2 (relative to our previously reported CLASP TOG2 structure  
127 [31]). These structures demonstrate that TOG architectures are positionally conserved  
128 across the CLASP family, but have non-equivalent architectures along the array. While  
129 tubulin-binding activity has not been detected for CLASP TOG1, CLASP1 TOG1 does  
130 conform to a tubulin-binding TOG architecture as observed in the structures of Stu2  
131 TOG1 and TOG2 in complex with tubulin [33,34,40]. In contrast, CLASP1 TOG2, while  
132 containing Stu2 TOG-like tubulin binding determinants, adheres to a convex architecture  
133 across its tubulin-binding surface that predicts a unique tubulin-binding mode. The

## Structures of CLASP1 TOG1 and TOG2

134 structures of CLASP1 TOG1 and CLASP1 TOG2 are architecturally distinct from one  
135 another as well as from the previously reported structure of CLASP2 TOG3. Modeling  
136 analyses suggest that TOG2 and TOG3 each engages tubulin in the microtubule lattice in  
137 a distinct fashion. This work highlights the emerging paradigm of a structurally diverse  
138 TOG domain array in which architecturally distinct domains each play unique roles in  
139 regulating microtubule dynamics.

## Structures of CLASP1 TOG1 and TOG2

### 140 **Materials and methods**

141

### 142 **Protein expression and purification**

143 Human CLASP1 TOG1 (residues 1-257) and TOG2 (residues 284-552) bacterial  
144 expression constructs were generated using the polymerase chain reaction method and  
145 individually sub-cloned into pET28 (Millipore Sigma, Burlington, MA). TOG1 and  
146 TOG2 construct expression and purification protocols were identical except as noted for  
147 the growth of TOG1 in minimal media containing selenomethionine, ion exchange  
148 chromatography, and final exchange buffer. Constructs were transfected into *Escherichia*  
149 *coli* (TOG1: B834 cells; TOG2: BL21 DE3 pLysS cells), grown to an optical density at  
150 600 nm of 1.0 in media (TOG1: minimal media supplemented with seleno-L-methionine  
151 as described [41]; TOG2: Luria Broth) containing 50 µg/l kanamycin, the temperature  
152 lowered to 18° C, and protein expression induced with 100 µM Isopropyl β-D-1-  
153 thiogalactopyranoside for 16 hours. Cells were harvested by centrifugation, resuspended  
154 in buffer A (25 mM Tris pH 8.0, 200 mM NaCl, 10 mM imidazole, 0.1% β-ME) at 4° C,  
155 and lysed by sonication. Phenylmethylsulfonyl fluoride was added to 1 mM final  
156 concentration. Cells debris was pelleted by centrifugation at 23,000 x g for 45 minutes  
157 and the supernatant loaded onto a 5 ml Ni<sup>2+</sup>-NTA column (Qiagen, Hilden, Germany).  
158 The column was washed with 500 ml buffer A and protein eluted over a 250 ml linear  
159 gradient from 100% buffer A to 100% buffer B (buffer B = buffer A supplemented with  
160 290 mM imidazole). Peak fractions were pooled, CaCl<sub>2</sub> added to 1 mM final  
161 concentration, and 0.1 mg bovine α-thrombin added to proteolytically cleave off the N-  
162 terminal His<sub>6</sub> tag on each construct. After a 24 hour incubation period at 4° C, protein



## Structures of CLASP1 TOG1 and TOG2

163 was filtered over 0.5 ml of benzamidine sepharose (GE Healthcare Bio-Sciences,  
164 Pittsburgh, PA) and concentrated in a Millipore 10k MWCO centrifugal concentrator  
165 (Millipore Sigma, Burlington, MA). TOG1 was diluted into 100 ml buffer C (25 mM Tris  
166 pH 8.0, 0.1 %  $\beta$ -ME), and loaded onto a 10 ml Q-sepharose Fast Flow column (GE  
167 Healthcare Bio-Sciences, Pittsburgh, PA). Protein was washed with 200 ml buffer C and  
168 eluted using a 250 ml linear gradient between 100% buffer C and 100% buffer D (buffer  
169 D = buffer C + 1 M NaCl). Peak fractions were pooled and protein was concentrated and  
170 exchanged into storage buffer (10 mM Tris pH 8.0, 150 mM NaCl, 0.1%  $\beta$ -ME). TOG2  
171 was diluted into 100 ml buffer E (25 mM Hepes pH 7.0, 0.1 %  $\beta$ -ME), and loaded onto a  
172 10 ml SP-sepharose Fast Flow column (GE Healthcare Bio-Sciences, Pittsburgh, PA).  
173 Protein was washed with 200 ml buffer E and eluted using a 250 ml linear gradient  
174 between 100% buffer E and 100% buffer F (buffer F = buffer E + 1 M NaCl). Peak  
175 fractions were pooled and protein was concentrated and exchanged into storage buffer  
176 (25 mM Hepes pH 7.0, 200 mM NaCl, 0.1%  $\beta$ -ME).

177

### 178 **Crystallization, data collection, and structure determination**

179 Selenomethionine-substituted TOG1 was crystallized via hanging drop: 2  $\mu$ l of 10 mg/ml  
180 protein plus 2  $\mu$ l of a 1 ml well solution containing 0.1 M 2-(*N*-  
181 morpholino)ethanesulfonic acid (MES) pH 6.5, 30% PEG 600, 10% glycerol, 18 °C.  
182 Crystals were grown from microseeds that originally crystallized in 1.5 M sodium  
183 malonate, pH 6.25, 18 °C. TOG2 was crystallized via hanging drop: 2  $\mu$ l of 10 mg/ml  
184 protein plus 2  $\mu$ l of a 1 ml well solution containing 22% PEG 3350 and 200 mM sodium  
185 citrate (pH 8.25), 18 °C. TOG1 and TOG2 crystals were frozen in paratone-N (Hampton

## Structures of CLASP1 TOG1 and TOG2

186 Research, Aliso Viejo, CA) and diffraction data sets collected on single crystals at the  
187 Advanced Photon Source 22-ID beamline at 100 K. Data were processed using HKL2000  
188 [42]. Attempts to determine phases for the TOG1 structure using single wavelength  
189 anomalous dispersion (SAD) phasing methods failed from crystals grown in 1.5 M  
190 sodium malonate, pH 6.25. Attempts to obtain phasing via molecular replacement (TOG1  
191 search model: *Drosophila* MAST TOG1, PDB accession code 4G3A, chain A [38]) also  
192 failed. Thus, crystals grown in 0.1 M MES pH 6.5, 30% PEG 600, 10% glycerol, seeded  
193 from the original crystals grown in sodium malonate, were used for anomalous  
194 diffraction experiments and provided the SAD phasing for structure determination. The  
195 TOG2 structure was determined via molecular replacement using a TOG2 search model:  
196 human CLASP1 TOG2, PDB accession code 4K92, chain A [31].

197

198 Initial models were built using AutoBuild (PHENIX) followed by reiterative  
199 buildings in Coot [43] and subsequent refinement runs using phenix.refine (PHENIX)  
200 [44]. Refinement runs used real space, simulated annealing refinement protocols  
201 (temperatures: 5,000 K start, 300 K final, 50 steps), and individual B-factor refinement,  
202 using a maximum-likelihood target. Atomic displacement parameters were calculated for  
203 the TOG2 structure. The final refinement runs produced an  $R_{\text{free}}$  value of 24.4% for the  
204 TOG1 structure and an  $R_{\text{free}}$  value of 22.1% for the TOG2 structure. The final TOG1  
205 model includes residues 1-234 for chain A, residues 1-236 for chain B, and 201 water  
206 molecules. The final TOG2 model includes residues 295-538 for chains A and B and 678  
207 water molecules. Data collection and refinement statistics are summarized in Table 1.  
208 Structure images were generated using the PyMOL Molecular Graphics System, version

## Structures of CLASP1 TOG1 and TOG2

209 1.5.0.5 (Schrödinger, LLC, New York, NY). Electrostatic calculations used the PyMOL  
210 plugin APBS [45]. Pairwise structure comparisons and root mean square displacement  
211 (rmsd) values were calculated using the Dali server [46].

## Structures of CLASP1 TOG1 and TOG2

### 212 **Results and discussion**

213

#### 214 **The $\alpha$ -solenoid HEAT repeat structure of CLASP1 TOG1**

215 To determine the structure of human CLASP1 TOG1 we crystallized a selenomethionine-  
216 substituted construct embodying residues 1 to 257 and collected a 2.15 Å resolution  
217 single wavelength anomalous dispersion dataset. Crystals belong to the space group  $P2_1$   
218 and contain two protomers in the asymmetric unit. The structure was refined to R and  
219  $R_{\text{free}}$  values of 19.0% and 24.4% respectively. Data collection and refinement statistics  
220 are presented in Table 1.

221

222 CLASP TOG1 is an  $\alpha$ -solenoid structure, consisting of six HRs designated HR A  
223 through F (Fig 1B). We delineate the helices of each HR  $\alpha$  and  $\alpha'$ , followed by the  
224 number of the TOG domain in the array and the letter of the HR to which the helix  
225 belongs. The HRs conform to a general TOG-domain architecture. The first HR triad  
226 (HRs A-C) has a right-handed supercoil. The second HR triad (HRs D-F) is translated  
227 relative to the axis of the first HR triad, introducing a jog in the supercoil that gives the  
228 domain a flat, paddle-like architecture, rather than an elongated spiral common to other  
229  $\alpha$ -solenoid structures. HRs D and E are oriented with a right-handed twist relative to one  
230 another, while HRs E and F are oriented with a left-handed twist (Fig 1B, lower panel).  
231 The architecture of CLASP1 TOG1 is similar to that of *Homo sapiens* CLASP2 TOG1  
232 and *D. melanogaster* MAST TOG1 [22,38], with overall pairwise C $\alpha$  rmsd values of 1.2  
233 and 2.4 Å for the CLASP1-CLASP2 and CLASP1-MAST comparisons respectively (Fig

## Structures of CLASP1 TOG1 and TOG2

234 1C, calculated using the Dali server [46]). CLASP1 TOG1 aligns best to MAST TOG1

235 (the more divergent comparison) across the TOG face composed of intra-HR loops.

236

237 **TOG1 is highly conserved across the surface defined by intra-HR loops**

238 To examine TOG1 surface residue conservation, we generated a sequence alignment

239 involving *H. sapiens* CLASP1, *Xenopus laevis* Xorbit, *D. melanogaster* MAST, and

240 *Caenorhabditis elegans* CLS-1. We contoured conservation at 100% identity (dark

241 green), 100% similarity (light green), and 75% similarity (yellow) and mapped this

242 scheme on the *H. sapiens* CLASP1 TOG1 structure (Fig 2A,B). The domain face formed

243 by intra-HR loops displayed the highest degree of conservation (Fig 2B, upper right),

244 with additional conservation mapping to the face formed by the  $\alpha'$  helices of each HR

245 (Fig 2B, upper left). TOG domains of the XMAP215 family are known to engage tubulin

246 using the intra-HR loop surface. While CLASP1 TOG1 has a subset of intra-HR residues

247 that are positionally similar to those found in XMAP215 TOG tubulin binding

248 determinants, there are also significant differences. Specifically, XMAP215 family TOG

249 domains primarily contain a tryptophan in the HR A loop. The homologous position in

250 CLASP1 TOG1 is a valine (V17) that is not conserved (Fig 2C,D); *D. melanogaster*

251 MAST TOG1 and *C. elegans* CLS-1 TOG1 have a methionine and proline in the

252 equivalent position respectively (Fig 2A). Interestingly, while XMAP215 family TOG

253 domains are primarily conserved across the HR A-C intra-HEAT loops, CLASP TOG1

254 conservation is primarily focused along the surface formed by the HR C-E intra-HR

255 loops. Collectively, CLASP1 TOG1 has a canonical TOG domain architecture, but its

## Structures of CLASP1 TOG1 and TOG2

256 unique surface residue conservation pattern suggests a binding function distinct from  
257 XMAP215 family TOG domains.

258

### 259 **Mammalian CLASP TOG2 forms a conserved convex architecture**

260 Previous structural work analyzing CLASP TOG2 revealed a highly bent, convex TOG  
261 architecture [31,39]. To determine if this architecture was due to crystal packing, we  
262 determined the structure of CLASP1 TOG2 in a different space group,  $P2_1$ , as compared  
263 to the initial structure that was determined in the space group  $P2_12_12_1$  [31]. Native  
264 diffraction data was collected to a resolution of 1.78 Å. The crystal contains two  
265 protomers in the asymmetric unit. The structure was solved by molecular replacement  
266 using the structure of *H. sapiens* CLASP1 TOG2 as a search model (PDB accession code  
267 4K92 [31]). The structure was refined to R and  $R_{\text{free}}$  values of 17.7 % and 22.1%  
268 respectively. Data collection and refinement statistics are presented in Table 1.

269

270       The CLASP1 TOG2 structure determined in space group  $P2_1$  conforms to the bent  
271 TOG architecture observed in space group  $P2_12_12_1$  (Fig 3A). As previously observed,  
272 TOG2 has a bend between the HR A-C and HR D-F triads that orients the HR D-F intra-  
273 HR loop surface at  $\sim 30^\circ$  relative to the plane established by the HR A-C intra-HR loops.  
274 This deviates significantly from the flat surface observed across XMAP215 family TOG  
275 intra-HR loops used to engage tubulin (discussed further below). In addition to its bent  
276 architecture, TOG2 has a conserved N-terminal helix,  $\alpha 2N$ , which is positioned  
277 alongside, and orthogonal to the  $\alpha 2B'$  and  $\alpha 2C'$  helices (Fig 3A). The two protomers in  
278 the  $P2_1$  asymmetric unit have an overall C $\alpha$  rmsd of 1.4 Å. Comparing protomers

## Structures of CLASP1 TOG1 and TOG2

279 determined in the  $P2_1$  space group to those determined in the  $P2_12_12_1$  space group showed  
280 little structure deviation with low overall  $C\alpha$  pairwise rmsd values that ranged from 0.3 to  
281 1.3 Å. Comparison of the CLASP1 TOG2 protomers with the structure of CLASP2  
282 TOG2, which has 81% sequence identity, yielded overall  $C\alpha$  rmsd values that ranged  
283 from 1.0-1.3 Å (Fig 3B). Collectively, the bent architecture of CLASP TOG2 domains is  
284 conserved and reflects a key structural state of the domain.

285

### 286 **TOG2 is highly conserved across the convex intra-HR loop surface**

287 We next examined TOG2 surface residue conservation using the same species and  
288 conservation criteria laid forth in our TOG1 analysis (Fig 4A,B). As observed with  
289 TOG1, the domain face formed by intra-HEAT loops displayed the highest degree of  
290 conservation (Fig 4B, upper right), with additional conservation mapping to the  
291 orthogonally-positioned  $\alpha 2N$  helix (Fig 4B, upper left). A significant amount of surface  
292 residue conservation mapped to the remaining faces of the domain, pertaining primarily  
293 to the 75% similarity criteria. Of the highly conserved intra-HR loops, most of the  
294 conservation maps to the first triad, HR A-C. The HR A loop contains a conserved  
295 tryptophan, positioned equivalent to the conserved HR A loop tryptophan found in  
296 XMAP215 family TOG domains that engage  $\beta$ -tubulin (Fig 4C,D) [30,32–34]. A  
297 significant, yet lower degree of conservation maps to the second triad's (HR D-F) intra-  
298 HR loops. Overall, TOG2 conservation implicates the intra-HR loops surface as a prime  
299 protein-protein interaction surface (implications for tubulin binding are discussed further  
300 below) while conservation across the remaining faces implicate these regions as likely  
301 protein-interaction surfaces as well. The degree of conservation across TOG2's surfaces

## Structures of CLASP1 TOG1 and TOG2

302 likely reflects the extent to which its cognate binding partners can co-evolve their  
303 interaction determinants. Specifically, the extent to which tubulin is conserved across  
304 species demands high cross-species conservation for the interaction determinants of its  
305 binding partners while additional factors that may bind other TOG2 surfaces (e.g. those  
306 involved in the auto-inhibition of TOG2 activity [22]) may be less evolutionarily  
307 constrained, permitting more variability and co-evolution of their respective binding  
308 interfaces.

309

### 310 **The CLASP TOG array is structurally diverse**

311 We next analyzed structural diversity across the CLASP TOG array, comparing our  
312 structures of CLASP1 TOG1, TOG2, as well as the previously reported structure of  
313 CLASP2 TOG3. We used the Dali server to structurally align the domains and calculate  
314 and overall rmsd value for corresponding Ca atoms [46]. Comparative analysis yielded  
315 the following high rmsd values: CLASP1 TOG1 versus CLASP1 TOG2: 3.3 Å rmsd;  
316 CLASP1 TOG1 versus CLASP2 TOG3: 2.9 Å rmsd; and CLASP1 TOG2 versus  
317 CLASP2 TOG3: 3.4 Å rmsd (Fig 5A). To determine whether specific subdomains  
318 contributed to this structural diversity, we again used the Dali server and analyzed the Ca  
319 rmsd across the TOG domains for each HR triad: HR A-C and HR D-F. The HR A-C  
320 triads aligned best, with rmsd values ranging from 1.9 Å (CLASP1 TOG1 versus  
321 CLASP2 TOG3) to 2.2 Å (CLASP1 TOG1 and CLASP2 TOG3 versus CLASP1  
322 TOG2)(Fig 5A). In contrast, the HR D-F triads had a higher degree of structural variance,  
323 with rmsd values ranging from 2.3 Å (CLASP1 TOG1 versus CLASP1 TOG2) to 2.9 Å  
324 (CLASP1 TOG2 versus CLASP2 TOG3)(Fig 5A). Thus, while the first triad is



## Structures of CLASP1 TOG1 and TOG2

325 structurally conserved across the CLASP TOG array, the second triad exhibits a higher  
326 degree of structural diversity. To determine if the relative positioning of the triads in each  
327 TOG domain also contributes to structural diversity across the CLASP TOG array, we  
328 structurally aligned the full TOG domains using the C $\alpha$  coordinates from each domain's  
329 respective HR A-C triad (Fig 5B). While TOG1 is relatively flat across the intra-HR loop  
330 surface, the alignment highlighted the relative bend between TOG2's two triads that  
331 angles HR D-F downwards (Fig 5B, top panel). While TOG3 is flat across the HR A-E  
332 intra-HR loop surface, the HR F intra-HR loop region is positioned downward from the  
333 HR A-E intra-HR loop surface. When the intra-HR loop surfaces of TOG3 are viewed  
334 from above (Fig 5B, bottom panel), additional shifts (orthogonal to the relative bend  
335 observed in TOG2) are evident. While TOG1 bends to the side of the domain defined by  
336 the HR  $\alpha'$  helices, TOG2 is relatively straight. In contrast, TOG3 bends in the opposite  
337 direction, towards the side of the domain defined by the HR  $\alpha$  helices. Collectively, the  
338 CLASP TOG array is structurally diverse, driven primarily by architectural diversity in  
339 the HR D-F triads as well as the relative positioning of the triads in the respective TOG  
340 domain. While each TOG domain in the array is architecturally distinct, the intra-HR  
341 loop surface of each domain is dominated by basic electrostatics and hydrophobic content  
342 (Fig 5C), suggesting that these conserved surfaces interact with the surface of a cognate  
343 partner that is negatively charged.

344

### 345 **Varied CLASP TOG architectures suggest distinct tubulin binding modes**

346 While structures of XMAP215 family TOG domains from the yeast member Stu2 bound  
347 to tubulin have informed how these TOG domains engage tubulin [33,34], how CLASP

## Structures of CLASP1 TOG1 and TOG2

348 TOG domains bind tubulin remains unknown. Studies to date have implicated CLASP  
349 TOG2 and TOG3 in tubulin-binding, however, binding between TOG1 and tubulin (free  
350 or lattice bound) has not been detected [30,31,38–40]. To gain insight into CLASP TOG-  
351 tubulin binding modes and the potential basis for the lack of detectable TOG1-tubulin  
352 binding, we superimposed CLASP TOG domains on the Stu2 TOG2-tubulin structure  
353 and analyzed the modeled complexes. To generate these models, we aligned CLASP  
354 TOG domains to Stu2 TOG2 by superpositioning the first HR triads of each domain  
355 using the Dali server [46]. The basis for this was the structural conservation noted across  
356 the first HR A-C triad, which extended to Stu2 TOG2's first triad. Stu2 TOG2 engages  
357 the curved state of the  $\alpha\beta$ -tubulin heterodimer, which reflects tubulin's free state found in  
358 solution and at polymerizing and depolymerizing microtubule plus ends, as compared to  
359 the straight conformation found along the length of a microtubule [33,47,48]. Stu2 TOG2  
360 HRs A-D engage  $\beta$ -tubulin while HRs E-F engage  $\alpha$ -tubulin (Fig 6A) [33]. Key Stu2  
361 TOG2-tubulin interaction determinants are a HR A loop tryptophan, an alanine and  
362 asparagine in the HR B loop, basic residues in the HR C, E, and F loops, and a threonine  
363 and proline residue in the HR D loop (Fig 6B). While there is no evidence that CLASP  
364 TOG1 interacts with tubulin, CLASP1 TOG1 superimposes surprisingly well on the Stu2  
365 TOG2- $\alpha\beta$ -tubulin structure, with all intra-HEAT loops assuming an interaction mode that  
366 complements the surface of the tubulin heterodimer with HR E intercalating the groove  
367 between  $\alpha$ - and  $\beta$ -tubulin in a mode similar to Stu2 TOG2 HR E. Similarities between  
368 CLASP1 TOG1 and Stu2 TOG2 tubulin-binding determinants include the following:  
369 CLASP1 TOG1 has an asparagine in the HR B loop (N63), as well as basic residues in  
370 HR C, E, and F, that are positionally equivalent to Stu2 TOG2 K428, R519, and K549.

## Structures of CLASP1 TOG1 and TOG2

371 While CLASP1 TOG1 does not have a basic residue in HR C equivalent to K427, it does  
372 have an arginine in HR D (R142), the guanidinium group of which is positioned to  
373 occupy the same relative space as the Stu2 TOG2 K427 side chain amine. CLASP1  
374 TOG1 also has residues that are distinct from Stu2 TOG2 tubulin-binding determinants:  
375 as noted above, CLASP1 TOG1 lacks the conserved HR A loop tryptophan commonly  
376 found in XMAP215 TOG domains. Instead, CLASP1 TOG1 has a valine (V17) at the  
377 equivalent position. Additional intra-HR residues that are distinct to CLASP TOG1 are  
378 highlighted by conserved determinants in the HR D-F triad including HR D K139 and  
379 F141, HR E P178, and HR F S213 and R214 (Figs 2D and 6B). Overall, CLASP1 TOG1  
380 has an architecture that aligns well with the tubulin-binding TOG domains of Stu2, some  
381 residues are similar in nature to XMAP215 family tubulin-binding determinants, but  
382 others are unique to the CLASP family. Why CLASP1 TOG1 does not bind tubulin, and  
383 what the identity of its binding partner is remains to be determined. Recent studies have  
384 implicated TOG1 in non-tubulin binding roles including kinetochore localization and  
385 regulating CLASP-dependent effects on microtubule dynamics by inhibiting the activity  
386 of TOG2 [22,40].

387

388 Unlike CLASP1 TOG1, the modeling of CLASP TOG2 and TOG3 onto tubulin  
389 using the Stu2 TOG2-tubulin complex as a guide yielded significant gaps between the  
390 second HR triad and  $\alpha\beta$ -tubulin (Fig 6A). For CLASP1 TOG2, the bent architecture of  
391 the domain angles HRs D-F away from  $\alpha\beta$ -tubulin. Interestingly, CLASP1 TOG2 has  
392 many Stu2 TOG2-like tubulin binding determinants across its intra-HR loops including  
393 HR A W338 (equivalent to Stu2 W341), HR D S457 and V458 (equivalent to Stu2 T470

## Structures of CLASP1 TOG1 and TOG2

394 and P471 respectively), HR E R503 (equivalent to Stu2 R519), and HR F K534  
395 (equivalent to Stu2 R551)(Fig 6B). This suggests that CLASP TOG2 may engage tubulin  
396 across all of its intra-HR loops. If CLASP TOG2 adheres to a rigid conformation upon  
397 tubulin binding, this may in turn drive tubulin into a hyper-curved conformation that  
398 exceeds the curve observed in structures solved to date (e.g. see [33,49]). Recent work  
399 has demonstrated that CLASP TOG2 is necessary and sufficient for CLASP-dependent  
400 microtubule anti-catastrophe activity [22,23]. The unique bent architecture of CLASP  
401 TOG2 and its role limiting catastrophe may reflect the dynamic, curved protofilament  
402 architecture observed in both polymerizing and depolymerizing microtubules [48]. In  
403 contrast to the anti-catastrophe activity of CLASP TOG2, CLASP TOG3 has been found  
404 to promote microtubule rescue events [22]. Aligned with a distinct activity, our  
405 superpositioning model of TOG3 onto tubulin yields a distinct interaction mode (Fig 6A).  
406 CLASP TOG3 HR D is positioned away from  $\beta$ -tubulin and HR F is angled away from  $\alpha$ -  
407 tubulin. The unique positioning of TOG3's two HR triads relative to one another, and in  
408 comparison to the HR triads of Stu2 TOG2, leads to a unique positioning of the second  
409 HR triad on the surface of  $\alpha$ -tubulin. While CLASP TOG3 has a unique TOG  
410 architecture, it retains a set of key intra-HR residues that are position equivalent to the  
411 tubulin-binding determinants of Stu2 TOG2 and are well oriented to engage  $\alpha\beta$ -tubulin.  
412 These include HR A loop W660 (equivalent to Stu2 W341), HR B P699 and H700  
413 (equivalent to Stu2 A384 and N385 respectively), HR D S781 and L782 (equivalent to  
414 Stu2 T470 and P471 respectively), and HR E R830 (equivalent to Stu2 R519) (Fig 6B).  
415

## Structures of CLASP1 TOG1 and TOG2

416           The distinct architecture of TOG3, modeled with a unique lateral shift on the  
417 tubulin heterodimer (Fig 6A) suggests that it may be involved in engaging a laterally  
418 associated tubulin subunit on the microtubule. To examine this, we superimposed the  
419 model generated of TOG3 bound to free tubulin (Fig 6A) onto the lattice coordinates of  
420 GMPCPP-bound tubulin (PDB accession code 3JAT [50]). As modeled, CLASP TOG3  
421 makes contacts with the laterally-associated tubulin subunit on the adjacent  
422 protofilament. These contacts involve determinants in TOG3 HR B and the unique  
423 extended intra-HEAT loop of HR D (Fig 7A,B). The potential ability of CLASP TOG3 to  
424 bridge adjacent protofilaments may underlie its ability to promote rescue.  
425  
426

## Structures of CLASP1 TOG1 and TOG2

### 427 **Conclusion**

428

429 We have used crystallography to determine the structures of human CLASP1 TOG1 and  
430 TOG2. Our comparison of these structures to other CLASP TOG domain structures and  
431 to XMAP215 tubulin-binding TOG domains has highlighted a number of features of the  
432 CLASP TOG array: 1) each TOG domain along the CLASP TOG array has a unique  
433 architecture, 2) the structure of each specific TOG domain along the CLASP TOG array  
434 is well conserved across species, across paralogs, and across different crystal space  
435 groups, 3) the unique structures of these TOG domains and their respective conserved  
436 determinants correlates with each TOG domain having unique activities: TOG1 plays a  
437 non-tubulin binding role in kinetochore localization and relieving the auto-inhibition of  
438 TOG2's anti-catastrophe activity, TOG2 plays a role in limiting catastrophe, and TOG3  
439 plays a role in promoting rescue, 4) the unique structures of TOG2 and TOG3 predict  
440 distinct modes of tubulin binding on the microtubule lattice: TOG2 may preferentially  
441 engage a hyper-curved tubulin state and TOG3 may bridge adjacent tubulin subunits on  
442 neighboring protofilaments.

443

444 While our work highlights distinct structural features of the TOG array, a number  
445 of key questions remain outstanding. 1) What factor does TOG1 bind? While CLASP  
446 TOG1 has an architecture that is similar to the tubulin-binding architecture of Stu2 TOG2  
447 bound to tubulin and has intra-HR determinants that are similar to those Stu2 TOG2 uses  
448 to bind tubulin, no tubulin-binding activity has been ascribed to CLASP TOG1. Instead  
449 of binding tubulin, CLASP TOG1's conserved intra-HR loops may be involved in

## Structures of CLASP1 TOG1 and TOG2

450 binding a kinetochore factor [40,51], relieving the auto-inhibition of CLASP TOG2  
451 activity [22], binding actin [52], or a yet to be determined factor. 2) What is the structural  
452 conformation of a TOG2- and a TOG3-tubulin complex as found on a microtubule? Will  
453 these structures yield insight into novel structural states of the tubulin heterodimer and  
454 will these states inform the mechanisms by which TOG2 and TOG2 affect microtubule  
455 dynamics? 3) While the CLASP TOG array is composed of structurally distinct TOG  
456 structures arranged in a specific order, can the array function properly if shuffled or do  
457 the unique architectures play synergistic position- and spatial-specific roles along the  
458 polarized microtubule lattice? 4) While the structural nature of CLASP's three TOG  
459 domains (TOG1-3) has been elucidated, little is known about the C-terminal CLIP-ID  
460 [13]. The CLIP-ID is predicted to be composed of HRs and analysis suggests that it may  
461 conform to a TOG architecture as found in XMAP215 TOG5 [35]. Whether this is the  
462 case, whether the CLIP-ID has tubulin- or microtubule-binding activity, and how CLIP-  
463 170 binds the CLIP-ID remains to be determined.

464

465 Our work highlights the structural diversity of the known TOG domains that  
466 comprise the CLASP TOG array. This adds to our growing understanding of TOG  
467 domain structural diversity and the specific role these structures play when arrayed in  
468 different regulators of microtubule dynamics, including the CLASP family, the  
469 XMAP215 family of microtubule polymerases, and the Crescerin family that regulates  
470 microtubule dynamics in cilia [53–55].

471

## Structures of CLASP1 TOG1 and TOG2

### 472 **Accession numbers**

473

474 **RSCB Protein Data Bank.** Coordinate and structure factors for the CLASP1 TOG1 and  
475 have been deposited with the accession code 6MQ5. Coordinate and structure factors for  
476 the CLASP1 TOG2 structure and have been deposited with the accession code 6MQ7.

477

### 478 **Acknowledgments**

479

480 We thank the staff at the Argonne National Laboratory Advanced Photon Source SER-  
481 CAT beamlines 22-ID and 22-BM for support. Use of the Advanced Photon Source was  
482 supported by the U. S. Department of Energy, Office of Science, Office of Basic Energy  
483 Sciences, under Contract No. DE-AC02-06CH11357.

484



## Structures of CLASP1 TOG1 and TOG2

485 **Author Contributions**

486

487 **Conceptualization:** Jonathan B. Leano, Kevin C. Slep

488 **Data Curation:** Jonathan B. Leano, Kevin C. Slep

489 **Formal Analysis:** Jonathan B. Leano, Kevin C. Slep

490 **Funding Acquisition:** Jonathan B. Leano, Kevin C. Slep

491 **Investigation:** Jonathan B. Leano, Kevin C. Slep

492 **Methodology:** Jonathan B. Leano, Kevin C. Slep

493 **Project Administration:** Kevin C. Slep

494 **Resources:** Kevin C. Slep

495 **Supervision:** Kevin C. Slep

496 **Validation:** Jonathan B. Leano, Kevin C. Slep

497 **Visualization:** Kevin C. Slep

498 **Writing – Original Draft Preparation:** Kevin C. Slep

499 **Writing – Review & Editing:** Jonathan B. Leano, Kevin C. Slep

## Structures of CLASP1 TOG1 and TOG2

### 500 **References**

501

- 502 1. Mitchison T, Kirschner M. Dynamic instability of microtubule growth. *Nature*.  
503 1984;312: 237–242.
- 504 2. Horio T, Hotani H. Visualization of the dynamic instability of individual  
505 microtubules by dark-field microscopy. *Nature*. 1986;321: 605–607.  
506 doi:10.1038/321605a0
- 507 3. Desai A, Mitchison TJ. Microtubule polymerization dynamics. *Annu Rev Cell Dev*  
508 *Biol*. 1997;13: 83–117. doi:10.1146/annurev.cellbio.13.1.83
- 509 4. Walker RA, O'Brien ET, Pryer NK, Soboeiro MF, Voter WA, Erickson HP, et al.  
510 Dynamic instability of individual microtubules analyzed by video light  
511 microscopy: rate constants and transition frequencies. *J Cell Biol*. 1988;107:  
512 1437–1448.
- 513 5. Perez F, Diamantopoulos GS, Stalder R, Kreis TE. CLIP-170 highlights growing  
514 microtubule ends in vivo. *Cell*. 1999;96: 517–527.
- 515 6. Mimori-Kiyosue Y, Shiina N, Tsukita S. The dynamic behavior of the APC-  
516 binding protein EB1 on the distal ends of microtubules. *Curr Biol CB*. 2000;10:  
517 865–868.
- 518 7. Honnappa S, Gouveia SM, Weisbrich A, Damberger FF, Bhavesh NS, Jawhari H,  
519 et al. An EB1-binding motif acts as a microtubule tip localization signal. *Cell*.  
520 2009;138: 366–376. doi:10.1016/j.cell.2009.04.065
- 521 8. Jiang K, Toedt G, Montenegro Gouveia S, Davey NE, Hua S, van der Vaart B, et al.  
522 A Proteome-wide screen for mammalian SxIP motif-containing microtubule  
523 plus-end tracking proteins. *Curr Biol CB*. 2012;22: 1800–1807.  
524 doi:10.1016/j.cub.2012.07.047
- 525 9. Maurer SP, Fourniol FJ, Bohner G, Moores CA, Surrey T. EBs recognize a  
526 nucleotide-dependent structural cap at growing microtubule ends. *Cell*.  
527 2012;149: 371–382. doi:10.1016/j.cell.2012.02.049
- 528 10. Kumar A, Manatschal C, Rai A, Grigoriev I, Degen MS, Jaussi R, et al. Short Linear  
529 Sequence Motif LxxPTPh Targets Diverse Proteins to Growing Microtubule  
530 Ends. *Struct Lond Engl* 1993. 2017;25: 924-932.e4.  
531 doi:10.1016/j.str.2017.04.010
- 532 11. Slep KC, Rogers SL, Elliott SL, Ohkura H, Kolodziej PA, Vale RD. Structural  
533 determinants for EB1-mediated recruitment of APC and spectraplakins to the

## Structures of CLASP1 TOG1 and TOG2

- 534 microtubule plus end. *J Cell Biol.* 2005;168: 587–598.  
535 doi:10.1083/jcb.200410114
- 536 12. Honnappa S, John CM, Kostrewa D, Winkler FK, Steinmetz MO. Structural  
537 insights into the EB1-APC interaction. *EMBO J.* 2005;24: 261–269.  
538 doi:10.1038/sj.emboj.7600529
- 539 13. Akhmanova A, Hoogenraad CC, Drabek K, Stepanova T, Dortland B, Verkerk T,  
540 et al. Clasps are CLIP-115 and -170 associating proteins involved in the  
541 regional regulation of microtubule dynamics in motile fibroblasts. *Cell.*  
542 2001;104: 923–935.
- 543 14. Mimori-Kiyosue Y, Grigoriev I, Lansbergen G, Sasaki H, Matsui C, Severin F, et al.  
544 CLASP1 and CLASP2 bind to EB1 and regulate microtubule plus-end dynamics  
545 at the cell cortex. *J Cell Biol.* 2005;168: 141–153. doi:10.1083/jcb.200405094
- 546 15. van der Vaart B, Manatschal C, Grigoriev I, Olieric V, Gouveia SM, Bjelic S, et al.  
547 SLAIN2 links microtubule plus end-tracking proteins and controls microtubule  
548 growth in interphase. *J Cell Biol.* 2011;193: 1083–1099.  
549 doi:10.1083/jcb.201012179
- 550 16. Li W, Moriwaki T, Tani T, Watanabe T, Kaibuchi K, Goshima G. Reconstitution of  
551 dynamic microtubules with *Drosophila* XMAP215, EB1, and Sentin. *J Cell Biol.*  
552 2012;199: 849–862. doi:10.1083/jcb.201206101
- 553 17. Li W, Miki T, Watanabe T, Kakeno M, Sugiyama I, Kaibuchi K, et al. EB1  
554 promotes microtubule dynamics by recruiting Sentin in *Drosophila* cells. *J Cell*  
555 *Biol.* 2011;193: 973–983. doi:10.1083/jcb.201101108
- 556 18. Andersen SS. *Xenopus* interphase and mitotic microtubule-associated proteins  
557 differentially suppress microtubule dynamics in vitro. *Cell Motil Cytoskeleton.*  
558 1998;41: 202–213. doi:10.1002/(SICI)1097-0169(1998)41:3<202::AID-  
559 CM2>3.0.CO;2-X
- 560 19. Cullen CF, Deák P, Glover DM, Ohkura H. mini spindles: A gene encoding a  
561 conserved microtubule-associated protein required for the integrity of the  
562 mitotic spindle in *Drosophila*. *J Cell Biol.* 1999;146: 1005–1018.
- 563 20. Inoue YH, do Carmo Avides M, Shiraki M, Deak P, Yamaguchi M, Nishimoto Y, et  
564 al. Orbit, a novel microtubule-associated protein essential for mitosis in  
565 *Drosophila melanogaster*. *J Cell Biol.* 2000;149: 153–166.
- 566 21. Lawrence EJ, Arpag G, Norris SR, Zanic M. Human CLASP2 specifically regulates  
567 microtubule catastrophe and rescue. *Mol Biol Cell.* 2018;29: 1168–1177.  
568 doi:10.1091/mbc.E18-01-0016

## Structures of CLASP1 TOG1 and TOG2

- 569 22. Aher A, Kok M, Sharma A, Rai A, Olieric N, Rodriguez-Garcia R, et al. CLASP  
570 Suppresses Microtubule Catastrophes through a Single TOG Domain. *Dev Cell*.  
571 2018;46: 40-58.e8. doi:10.1016/j.devcel.2018.05.032
- 572 23. Majumdar S, Kim T, Chen Z, Munyoki S, Tso S-C, Brautigam CA, et al. An isolated  
573 CLASP TOG domain suppresses microtubule catastrophe and promotes rescue.  
574 *Mol Biol Cell*. 2018;29: 1359–1375. doi:10.1091/mbc.E17-12-0748
- 575 24. Gard DL, Kirschner MW. A microtubule-associated protein from *Xenopus* eggs  
576 that specifically promotes assembly at the plus-end. *J Cell Biol*. 1987;105:  
577 2203–2215.
- 578 25. Moriwaki T, Goshima G. Five factors can reconstitute all three phases of  
579 microtubule polymerization dynamics. *J Cell Biol*. 2016;215: 357–368.  
580 doi:10.1083/jcb.201604118
- 581 26. Sousa A, Reis R, Sampaio P, Sunkel CE. The *Drosophila* CLASP homologue,  
582 Mast/Orbit regulates the dynamic behaviour of interphase microtubules by  
583 promoting the pause state. *Cell Motil Cytoskeleton*. 2007;64: 605–620.  
584 doi:10.1002/cm.20208
- 585 27. Máthé E, Inoue YH, Palframan W, Brown G, Glover DM. Orbit/Mast, the CLASP  
586 orthologue of *Drosophila*, is required for asymmetric stem cell and cystocyte  
587 divisions and development of the polarised microtubule network that  
588 interconnects oocyte and nurse cells during oogenesis. *Dev Camb Engl*.  
589 2003;130: 901–915.
- 590 28. Pereira AL, Pereira AJ, Maia ARR, Drabek K, Sayas CL, Hergert PJ, et al.  
591 Mammalian CLASP1 and CLASP2 cooperate to ensure mitotic fidelity by  
592 regulating spindle and kinetochore function. *Mol Biol Cell*. 2006;17: 4526–  
593 4542. doi:10.1091/mbc.e06-07-0579
- 594 29. Lee H, Engel U, Rusch J, Scherrer S, Sheard K, Van Vactor D. The microtubule  
595 plus end tracking protein Orbit/MAST/CLASP acts downstream of the tyrosine  
596 kinase Abl in mediating axon guidance. *Neuron*. 2004;42: 913–926.  
597 doi:10.1016/j.neuron.2004.05.020
- 598 30. Slep KC, Vale RD. Structural basis of microtubule plus end tracking by  
599 XMAP215, CLIP-170, and EB1. *Mol Cell*. 2007;27: 976–991.  
600 doi:10.1016/j.molcel.2007.07.023
- 601 31. Leano JB, Rogers SL, Slep KC. A cryptic TOG domain with a distinct architecture  
602 underlies CLASP-dependent bipolar spindle formation. *Struct Lond Engl* 1993.  
603 2013;21: 939–950. doi:10.1016/j.str.2013.04.018
- 604 32. Al-Bassam J, Larsen NA, Hyman AA, Harrison SC. Crystal structure of a TOG  
605 domain: conserved features of XMAP215/Dis1-family TOG domains and

## Structures of CLASP1 TOG1 and TOG2

- 606 implications for tubulin binding. *Struct Lond Engl* 1993. 2007;15: 355–362.  
607 doi:10.1016/j.str.2007.01.012
- 608 33. Ayaz P, Ye X, Huddleston P, Brautigam CA, Rice LM. A TOG: $\alpha\beta$ -tubulin complex  
609 structure reveals conformation-based mechanisms for a microtubule  
610 polymerase. *Science*. 2012;337: 857–860. doi:10.1126/science.1221698
- 611 34. Ayaz P, Munyoki S, Geyer EA, Piedra F-A, Vu ES, Bromberg R, et al. A tethered  
612 delivery mechanism explains the catalytic action of a microtubule polymerase.  
613 *eLife*. 2014;3: e03069. doi:10.7554/eLife.03069
- 614 35. Byrnes AE, Slep KC. TOG-tubulin binding specificity promotes microtubule  
615 dynamics and mitotic spindle formation. *J Cell Biol*. 2017;216: 1641–1657.  
616 doi:10.1083/jcb.201610090
- 617 36. Fox JC, Howard AE, Currie JD, Rogers SL, Slep KC. The XMAP215 family drives  
618 microtubule polymerization using a structurally diverse TOG array. *Mol Biol*  
619 *Cell*. 2014;25: 2375–2392. doi:10.1091/mbc.E13-08-0501
- 620 37. Howard AE, Fox JC, Slep KC. *Drosophila melanogaster* mini spindles TOG3  
621 utilizes unique structural elements to promote domain stability and maintain a  
622 TOG1- and TOG2-like tubulin-binding surface. *J Biol Chem*. 2015;290: 10149–  
623 10162. doi:10.1074/jbc.M114.633826
- 624 38. De la Mora-Rey T, Guenther BD, Finzel BC. The structure of the TOG-like  
625 domain of *Drosophila melanogaster* Mast/Orbit. *Acta Crystallograph Sect F*  
626 *Struct Biol Cryst Commun*. 2013;69: 723–729.  
627 doi:10.1107/S1744309113015182
- 628 39. Maki T, Grimaldi AD, Fuchigami S, Kaverina I, Hayashi I. CLASP2 Has Two  
629 Distinct TOG Domains That Contribute Differently to Microtubule Dynamics. *J*  
630 *Mol Biol*. 2015;427: 2379–2395. doi:10.1016/j.jmb.2015.05.012
- 631 40. Funk C, Schmeiser V, Ortiz J, Lechner J. A TOGL domain specifically targets yeast  
632 CLASP to kinetochores to stabilize kinetochore microtubules. *J Cell Biol*.  
633 2014;205: 555–571. doi:10.1083/jcb.201310018
- 634 41. Leahy DJ, Erickson HP, Aukhil I, Joshi P, Hendrickson WA. Crystallization of a  
635 fragment of human fibronectin: introduction of methionine by site-directed  
636 mutagenesis to allow phasing via selenomethionine. *Proteins*. 1994;19: 48–54.  
637 doi:10.1002/prot.340190107
- 638 42. Otwinowski Z, Minor W. Processing of X-ray diffraction data collected in  
639 oscillation mode. *Methods Enzymol*. 1997;276: 307–326.

## Structures of CLASP1 TOG1 and TOG2

- 640 43. Emsley P, Lohkamp B, Scott WG, Cowtan K. Features and development of Coot.  
641 Acta Crystallogr D Biol Crystallogr. 2010;66: 486–501.  
642 doi:10.1107/S0907444910007493
- 643 44. Adams PD, Afonine PV, Bunkóczi G, Chen VB, Davis IW, Echols N, et al. PHENIX:  
644 a comprehensive Python-based system for macromolecular structure solution.  
645 Acta Crystallogr D Biol Crystallogr. 2010;66: 213–221.  
646 doi:10.1107/S0907444909052925
- 647 45. Baker NA, Sept D, Joseph S, Holst MJ, McCammon JA. Electrostatics of  
648 nanosystems: application to microtubules and the ribosome. Proc Natl Acad Sci  
649 U S A. 2001;98: 10037–10041. doi:10.1073/pnas.181342398
- 650 46. Holm L, Rosenström P. Dali server: conservation mapping in 3D. Nucleic Acids  
651 Res. 2010;38: W545-549. doi:10.1093/nar/gkq366
- 652 47. Nogales E, Wolf SG, Downing KH. Structure of the alpha beta tubulin dimer by  
653 electron crystallography. Nature. 1998;391: 199–203. doi:10.1038/34465
- 654 48. McIntosh JR, O'Toole E, Morgan G, Austin J, Ulyanov E, Ataullakhanov F, et al.  
655 Microtubules grow by the addition of bent guanosine triphosphate tubulin to  
656 the tips of curved protofilaments. J Cell Biol. 2018;217: 2691–2708.  
657 doi:10.1083/jcb.201802138
- 658 49. Gigant B, Curmi PA, Martin-Barbey C, Charbaut E, Lachkar S, Lebeau L, et al. The  
659 4 A X-ray structure of a tubulin:stathmin-like domain complex. Cell. 2000;102:  
660 809–816.
- 661 50. Zhang R, Alushin GM, Brown A, Nogales E. Mechanistic Origin of Microtubule  
662 Dynamic Instability and Its Modulation by EB Proteins. Cell. 2015;162: 849–  
663 859. doi:10.1016/j.cell.2015.07.012
- 664 51. Cheeseman IM, MacLeod I, Yates JR, Oegema K, Desai A. The CENP-F-like  
665 proteins HCP-1 and HCP-2 target CLASP to kinetochores to mediate  
666 chromosome segregation. Curr Biol CB. 2005;15: 771–777.  
667 doi:10.1016/j.cub.2005.03.018
- 668 52. Tsvetkov AS, Samsonov A, Akhmanova A, Galjart N, Popov SV. Microtubule-  
669 binding proteins CLASP1 and CLASP2 interact with actin filaments. Cell Motil  
670 Cytoskeleton. 2007;64: 519–530. doi:10.1002/cm.20201
- 671 53. Bacaj T, Lu Y, Shaham S. The conserved proteins CHE-12 and DYF-11 are  
672 required for sensory cilium function in *Caenorhabditis elegans*. Genetics.  
673 2008;178: 989–1002. doi:10.1534/genetics.107.082453

## Structures of CLASP1 TOG1 and TOG2

- 674 54. Das A, Dickinson DJ, Wood CC, Goldstein B, Slep KC. Crescerin uses a TOG  
675 domain array to regulate microtubules in the primary cilium. *Mol Biol Cell*.  
676 2015; doi:10.1091/mbc.E15-08-0603
- 677 55. Louka P, Vasudevan KK, Guha M, Joachimiak E, Wloga D, Tomasi RF-X, et al.  
678 Proteins that control the geometry of microtubules at the ends of cilia. *J Cell*  
679 *Biol*. 2018; doi:10.1083/jcb.201804141
- 680 56. Holm L, Laakso LM. Dali server update. *Nucleic Acids Res*. 2016;44: W351-355.  
681 doi:10.1093/nar/gkw357
- 682
- 683

Structures of CLASP1 TOG1 and TOG2

684 **Table 1. Data processing and refinement statistics.**

685

| <b>Crystal</b>                                              | <b>CLASP1 TOG1</b>                | <b>CLASP1 TOG2</b>                |
|-------------------------------------------------------------|-----------------------------------|-----------------------------------|
| <b>Data Collection</b>                                      |                                   |                                   |
| Wavelength (Å)                                              | 0.97964                           | 1.0000                            |
| Space group                                                 | P2 <sub>1</sub>                   | P2 <sub>1</sub>                   |
| Cell dimensions: a,b,c (Å)                                  | 41.0, 114.0, 99.9                 | 51.6, 67.4, 81.0                  |
| Resolution (Å)                                              | 50.0-2.15 (2.23-2.15)             | 50.0-1.78 (1.84-1.78)             |
| # Reflections: Measured / Unique                            | 148,462 (11,001) / 41,883 (3,667) | 319,655 (19,398) / 51,928 (4,492) |
| Completeness (%)                                            | 92.3 (81.2)                       | 98.1 (85.4)                       |
| Mean redundancy                                             | 3.5 (3.0)                         | 6.8 (4.3)                         |
| <I/σI>                                                      | 9.6 (1.96)                        | 15.1 (2.8)                        |
| R <sub>sym</sub>                                            | 0.155 (0.646)                     | 0.095 (0.278)                     |
| <b>Refinement</b>                                           |                                   |                                   |
| Resolution (Å)                                              | 32.95-2.15 (2.20-2.15)            | 38.1-1.78 (1.83-1.78)             |
| R/ R <sub>free</sub> (%)                                    | 19.0 (24.4) / 24.4 (33.3)         | 17.7 (29.5) / 22.1 (38.0)         |
| # Reflections, R/R <sub>free</sub>                          | 21,034 (1768) / 1930 (159)        | 48317 (3683) / 1874 (153)         |
| Total atoms: Protein / Water                                | 3,868 / 183                       | 3,920 / 659                       |
| Stereochemical ideality (rmsd): Bonds / Angles (Å/°)        | 0.011 / 1.38                      | 0.008 / 1.05                      |
| Mean B-factors (Å <sup>2</sup> ): Overall / Protein / Water | 28.8 / 28.6 / 31.3                | 29.0 / 27.1 / 39.9                |
| Ramachandran Analysis: Favored / Allowed (%)                | 98.1 / 1.7                        | 99.2 / 0.8                        |
| <b>PDB accession code</b>                                   | 6MQ5                              | 6MQ7                              |

686 Values in parentheses indicate statistics for the highest-resolution shell.

687

688



## Structures of CLASP1 TOG1 and TOG2

### 689 **Figure legends**

690

691 **Fig 1. CLASP1 TOG1 forms a structurally conserved  $\alpha$ -solenoid composed of six**  
692 **HRs.** (A) Domain architecture of CLASP family members. *H. sapiens* (*H.s.*) CLASP1  
693 and CLASP2, *X. laevis* (*X.l.*) Xorbit, *D. melanogaster* (*D.m.*) MAST, *C. elegans* (*C.e.*)  
694 CLS-1, and *S. cerevisiae* (*S.c.*) Stu1p. Stu1p's two C-terminal domains are uniquely  
695 colored based on lack of homology to TOG3 and the CLIP-170 interaction domain  
696 (CLIP-ID) of other CLASP family members. (B) Architecture of *H. sapiens* CLASP1  
697 TOG1 shown in cartoon format. The helices of each of the six HRs (A-F) are colored  
698 across the spectrum. The image at top is rotated 90° about the x-axis to present the view  
699 shown at bottom which focuses on the intra-HR loops. The HR  $\alpha$ -solenoid is  
700 approximately 65 Å long. A translational shift between HR C and HR D prevents an  
701 overall supercoiling, common to  $\alpha$ -solenoid domains, thereby facilitating an overall flat,  
702 paddle-like architecture for the TOG domain. (C) Structural alignment of CLASP1 TOG1  
703 with *H. sapiens* CLASP2 TOG1 and *D. melanogaster* MAST TOG1 (PDB accession  
704 codes 5NR4 and 4G3A respectively, [22,38]). Pairwise alignment using the Dali server  
705 [56] yields 1.2 Å rmsd across 220 C $\alpha$  atoms for the CLASP1-CLASP2 TOG1  
706 comparison, and 2.4 Å rmsd across 224 C $\alpha$  atoms for the CLASP1-MAST TOG1  
707 comparison.

708

709 **Fig 2. CLASP TOG1 has a conserved face delineated by intra-HR loops.** (A)  
710 Sequence alignment of CLASP TOG1 from *H. sapiens* (*H.s.*) CLASP1, *X. laevis* (*X.l.*)  
711 Xorbit, *D. melanogaster* (*D.m.*) MAST, and *C. elegans* (*C.e.*) CLS-1. *H. sapiens*

## Structures of CLASP1 TOG1 and TOG2

712 CLASP1 TOG1 2° structure and solvent accessible surface area (SASA) are shown above  
713 the alignment. Residues are highlighted based on 100% identity (dark green), 100  
714 similarity (light green), and 75% similarity (yellow). (B) Cross-species conservation  
715 delineated in A, mapped on the CLASP1 TOG1 structure, and rotated in 90° steps about  
716 the x-axis. The orientation at upper left corresponds to the upper orientation in Figure 1B.  
717 Conservation primarily maps to the intra-HR loops that form the surface shown at upper  
718 right. Additional conservation maps to the face of the  $\alpha$ -solenoid delineated by the  $\alpha'$   
719 helix of each HR (face presented at upper left). (C) View of the HR A loop residue V17  
720 shown in stick format with  $2F_o - F_c$  electron density shown in blue, contoured at  $1.0 \sigma$ . (D)  
721 Intra-HR residues shown in stick format with conservation color-coded as in A and B.

722

723 **Fig 3. CLASP1 TOG2 forms a convex  $\alpha$ -solenoid, structurally homologous to**  
724 **CLASP2 TOG2** (A) Architecture of *H. sapiens* CLASP1 TOG2 shown in cartoon  
725 format. The helices of each of the six HRs (A-F) are colored across the spectrum.  
726 CLASP1 TOG2 has a unique N-terminal helix,  $\alpha 2N$ , that runs orthogonal to and contacts  
727 the  $\alpha'$  helices of HRs B and C. The image at top is rotated 90° about the x-axis to present  
728 the view shown at bottom which focuses on the intra-HR loops. The HR  $\alpha$ -solenoid is  
729 approximately 65 Å long. In contrast to canonical TOG structures determined to date,  
730 which form a relative straight surface across their intra-HR loops, CLASP TOG2 forms a  
731 bent, convex architecture across this surface (image at top). (C) Structural alignment of  
732 CLASP1 TOG1 and CLASP2 TOG2 (PDB accession code 3WOY, [39]). Pairwise  
733 alignment using the Dali server [56] yields 1.3 Å rmsd across 244 C $\alpha$  atoms for the  
734 CLASP1-CLASP2 TOG2 comparison.

## Structures of CLASP1 TOG1 and TOG2

735

736 **Fig 4. CLASP TOG2 has a conserved face delineated by intra-HR loops. (A)**

737 Sequence alignment of CLASP TOG2 from *H. sapiens* (*H.s.*) CLASP1, *X. laevis* (*X.l.*)

738 Xorbit, *D. melanogaster* (*D.m.*) MAST, and *C. elegans* (*C.e.*) CLS-1. *H. sapiens*

739 CLASP1 TOG2 2° structure and solvent accessible surface area (SASA) are shown above

740 the alignment. Residues are highlighted based on 100% identity (dark green), 100%

741 similarity (light green), and 75% similarity (yellow). (B) Cross-species conservation

742 delineated in A, mapped on the CLASP1 TOG2 structure and rotated in 90° steps about

743 the x-axis. The orientation at upper left corresponds to the upper orientation in Figure 3A.

744 Conservation primarily maps to the intra-HR loops that form the surface shown at upper

745 right. (C) View of the HR A loop residue W338 shown in stick format with 2F<sub>o</sub>-F<sub>c</sub>

746 electron density shown in blue, contoured at 1.0  $\sigma$ . (D) Intra-HR residues shown in stick

747 format with conservation color-coded as in A and B.

748

749 **Fig 5. CLASP TOG1, TOG2, and TOG3 have unique domain architectures. (A)**

750 Comparison of CLASP1 TOG1, CLASP1 TOG2, and CLASP2 TOG3 (PDB accession

751 code 3WOZ, [39]) structures using rmsd analysis of corresponding C $\alpha$  atoms across the

752 three domains (Dali server [56]). Pairwise analysis was performed, comparing HRs A-C,

753 D-F, and all six HRs: A-F. The HR A-C triad exhibits a higher degree of pairwise

754 structural homology with rmsd values ranging from 1.9-2.2 Å while the HR D-F triad has

755 lower pairwise structural homology, with rmsd values ranging from 2.3-2.9 Å. (B)

756 Structural comparison of CLASP TOGs 1-3. The TOG2 and TOG3 HR A-C triad was

757 structurally aligned to the CLASP TOG1 HR A-C triad using the Dali server [56]. The

## Structures of CLASP1 TOG1 and TOG2

758 alignment highlights the relative differential positioning of the HR D-F triads across the  
759 CLASP TOG array. Image at top is oriented with the intra-HR loops at the top of the  
760 domains. The image below was produced after a 90° rotation about the x-axis and focuses  
761 on the surface composed of intra-HR loops. (C) Electrostatic surface potential mapped on  
762 the structures of CLASP1 TOG1, TOG2, and CLASP2 TOG3. The surface of each  
763 domain presented is the surface composed of intra-HR loops, oriented as presented in the  
764 lower image of panel B.

765

### 766 **Fig 6. Distinct CLASP TOG architectures predict distinct tubulin binding**

767 **properties.** (A) CLASP TOG domains modeled on tubulin based on the structure of the  
768 XMAP215 microtubule polymerase family member Stu2 TOG2 in complex with  $\alpha\beta$ -  
769 tubulin (PDB accession code 4U3J [34], shown at top; Stu2 TOG2 in grey,  $\alpha$ - and  $\beta$ -  
770 tubulin shown in sand and lavender respectively). Stu2 TOG2 intra-HR loop residues are  
771 involved in  $\alpha\beta$ -tubulin binding. HRs A-D engage  $\beta$ -tubulin while HRs E-F engage  $\alpha$ -  
772 tubulin. To generate models of CLASP TOG domains bound to tubulin in a similar mode,  
773 the first HR triad (A-C) from each of CLASP's TOG domains was structurally aligned to  
774 the Stu2 TOG2 HR A-C triad using the Dali server [56]. TOG domains at left are shown  
775 in cartoon format along with a transparent molecular envelope. The images at right were  
776 generated after a 90° rotation about the y-axis and depict each TOG domain in surface  
777 representation. The CLASP2 TOG3 structure is from PDB accession code 3WOZ [39].  
778 (B) Comparative analysis of the intra-HR loop residues of each of CLASP's TOG  
779 domains, which in Stu2 TOG2 are used to bind tubulin. The orientation of each domain,

## Structures of CLASP1 TOG1 and TOG2

780 relative to the orientation shown in A (right panel) was generated after a 180° rotation

781 about the y-axis, followed by a 90° counterclockwise rotation about the z-axis.

782

783 **Fig 7. CLASP TOG3 is predicted to engage laterally associated tubulin on the**  
784 **microtubule lattice.** (A) Model of CLASP2 TOG3 superpositioned on a microtubule.

785 Shown are two laterally-associated tubulin heterodimers from neighboring

786 protofilaments. TOG3 is shown in dark purple and bound to the tubulin heterodimer

787 shown at right as in Fig 6A. The model generated of TOG3 bound to free tubulin (Fig 6)

788 was superpositioned onto the lattice coordinates of GMPCPP-bound tubulin (PDB

789 accession code 3JAT [50]). The tops of the  $\beta$ -tubulin subunits are shown (plus end

790 oriented towards the viewer), looking into the bore of the microtubule with the luminal

791 region oriented above and the microtubule exterior oriented below. CLASP TOG3 is

792 shown bound to the tubulin subunit at right, and can engage the laterally associated

793 tubulin subunit at left via intra-HR loop determinants in HR B and HR D. (B) Model as

794 shown in (A), viewed from the microtubule exterior with the plus end oriented up.  $\beta$ -

795 tubulin is shown in lavender,  $\alpha$ -tubulin is shown in wheat. Potential TOG3 HR B and HR

796 D contacts with the laterally-associated tubulin subunit are demarcated with red arrows.

797

## FIGURE 1

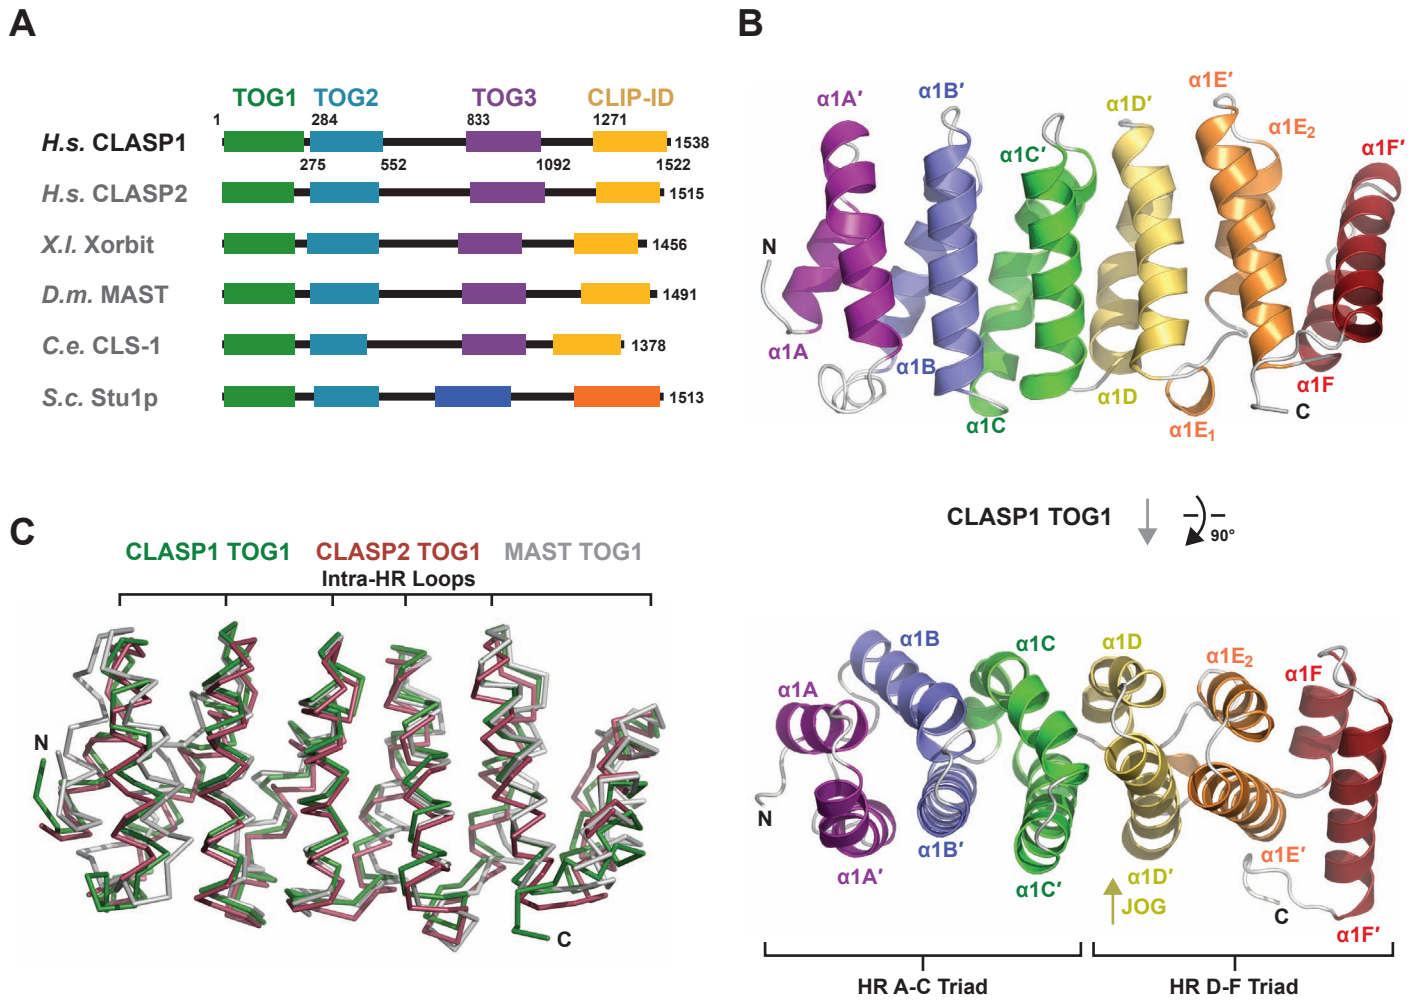

## FIGURE 2

**A**

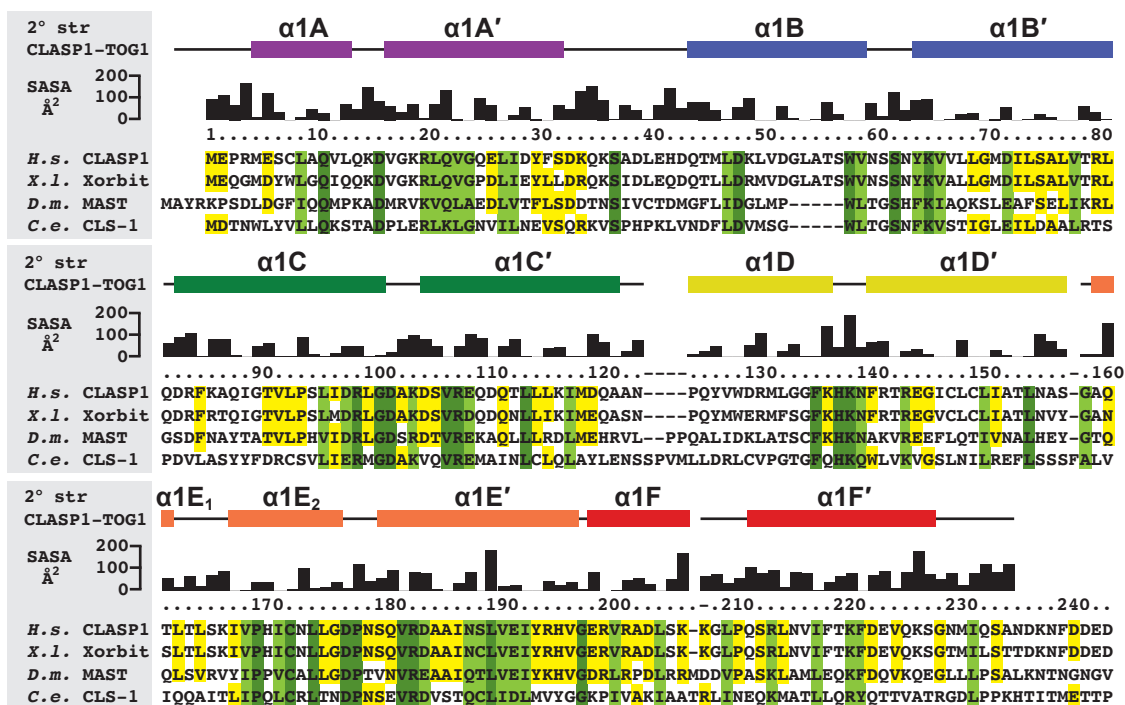

**B**

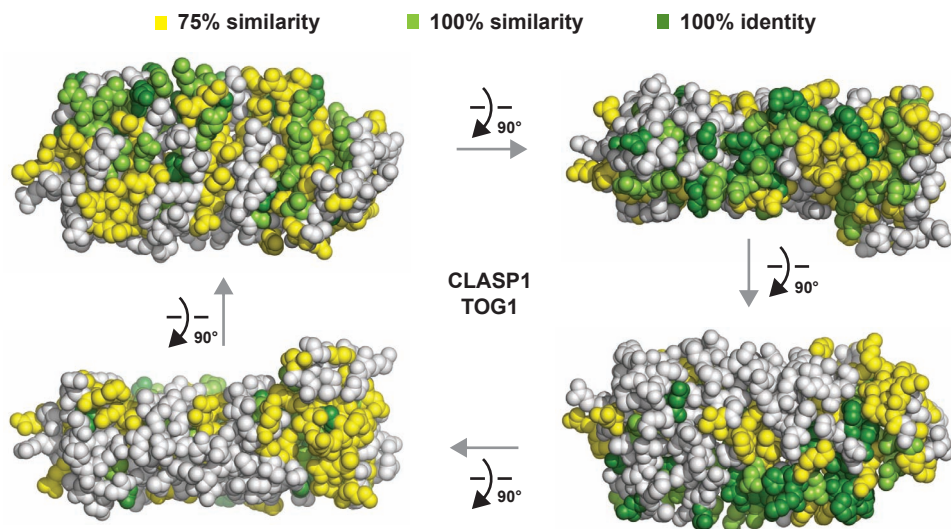

**C**

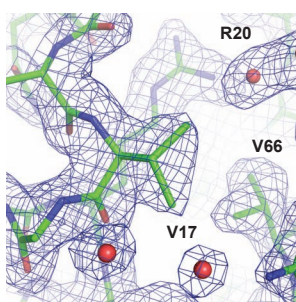

**D**

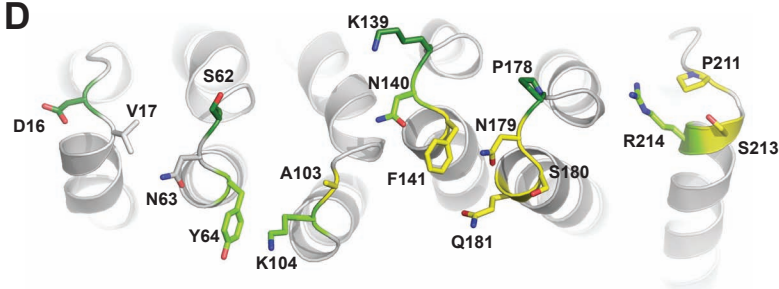

**FIGURE 3**

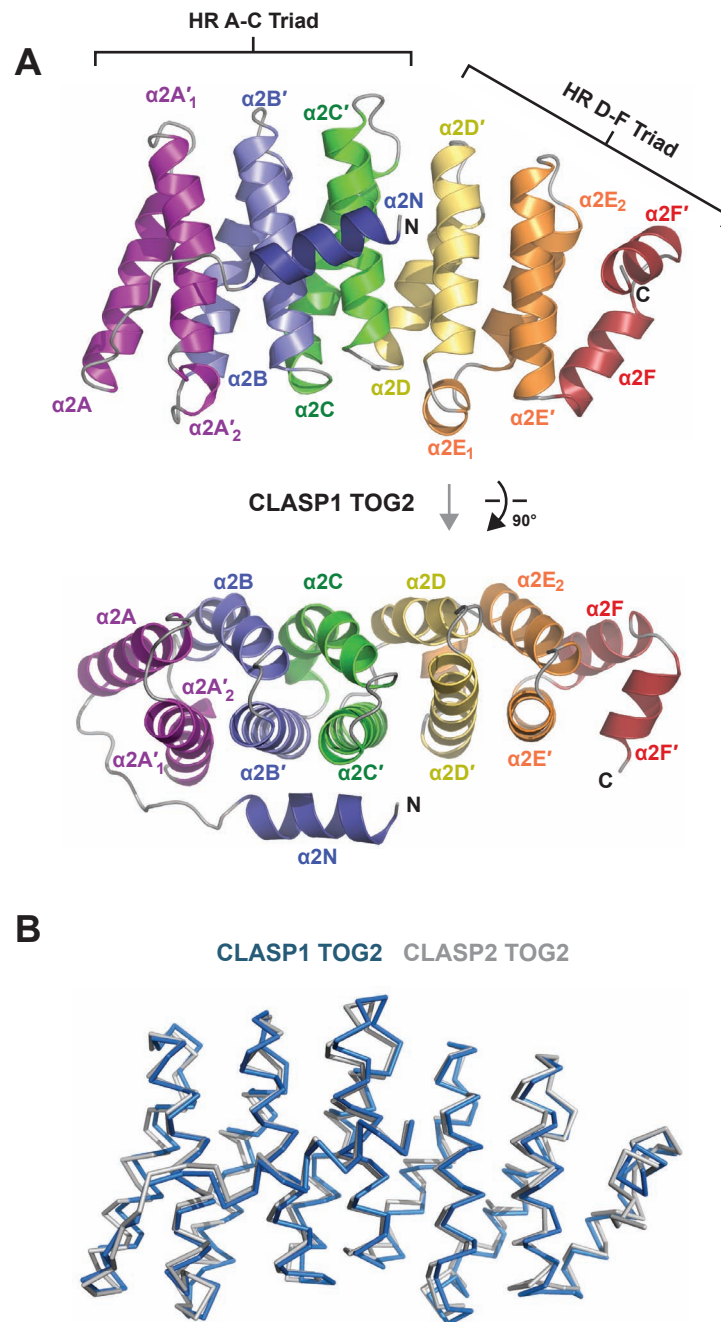



## FIGURE 4

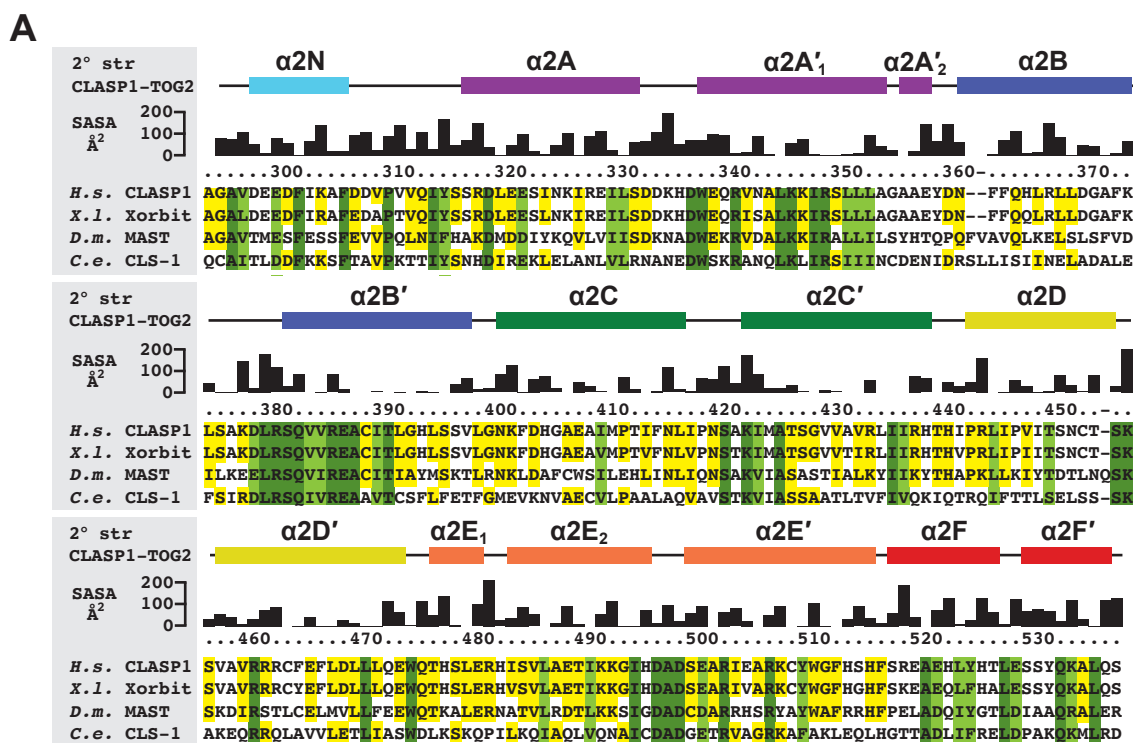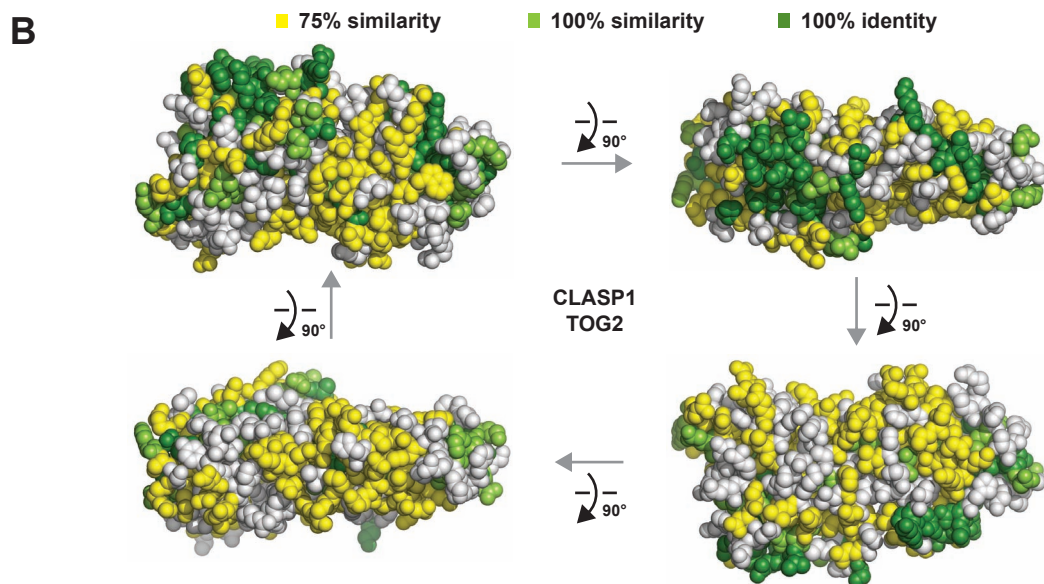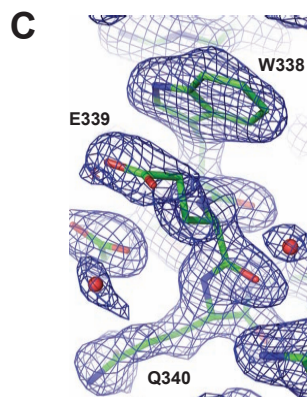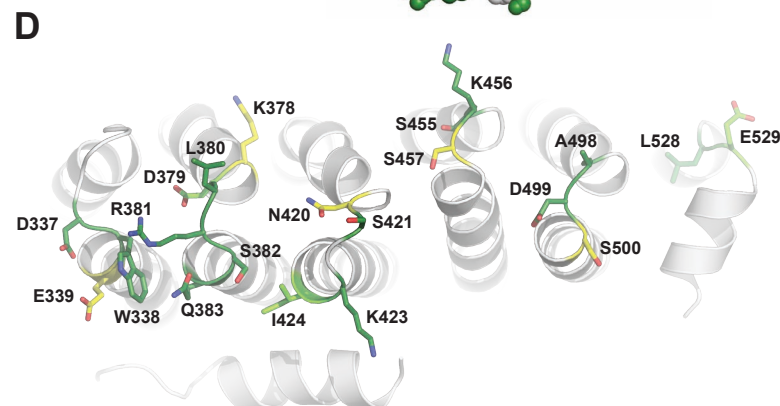

## FIGURE 5

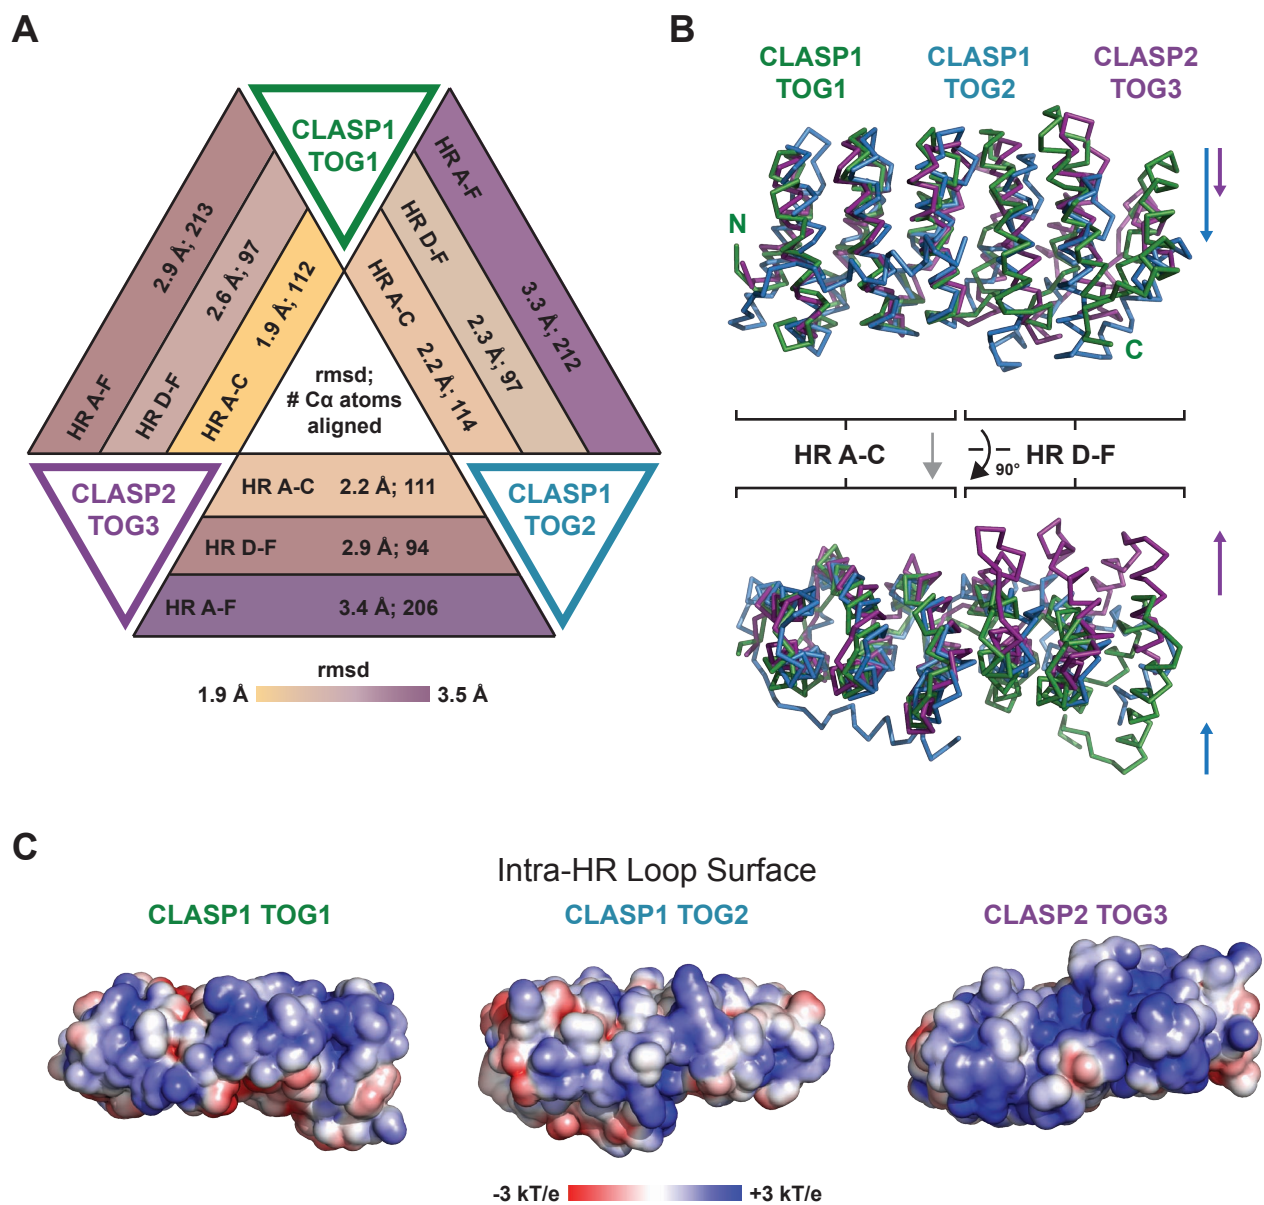

## FIGURE 6

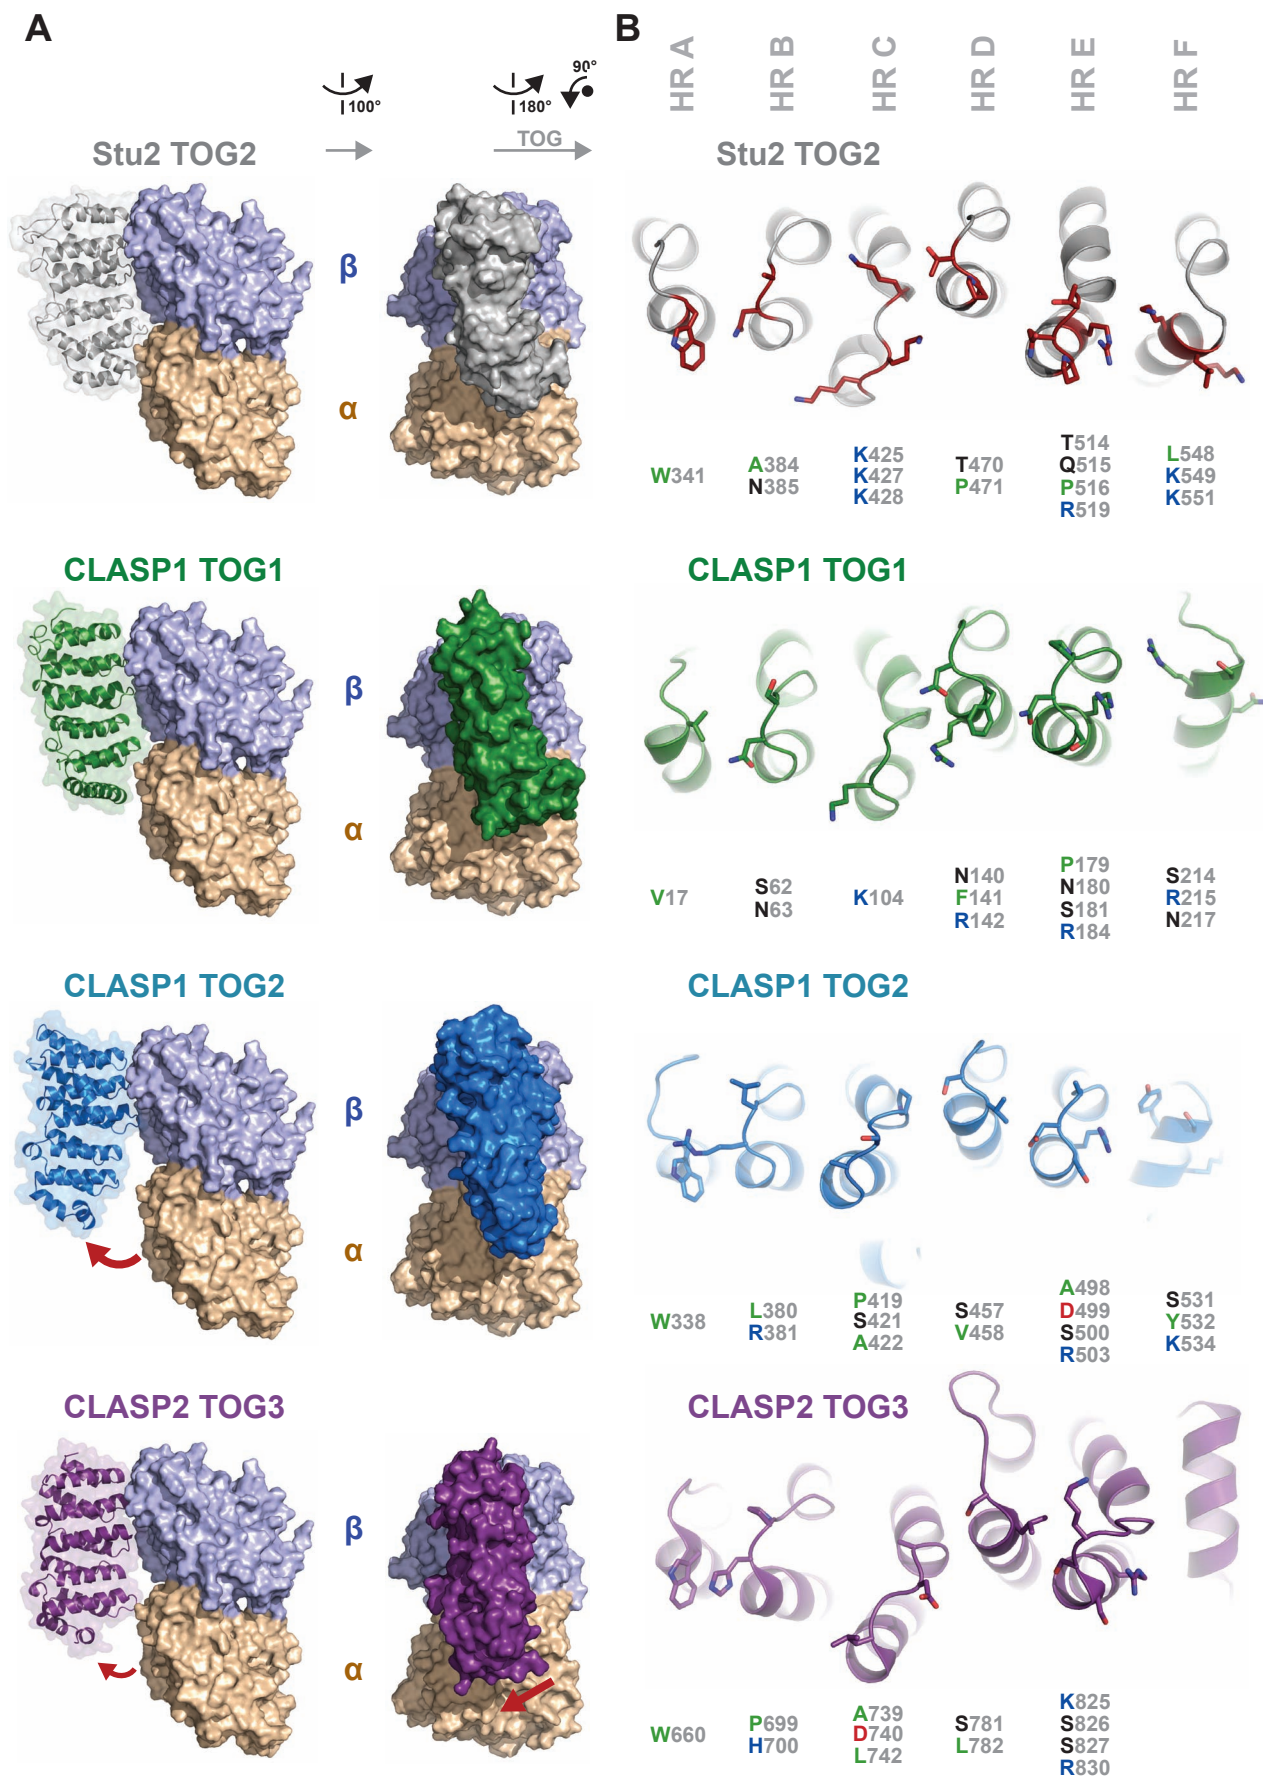

**FIGURE 7**

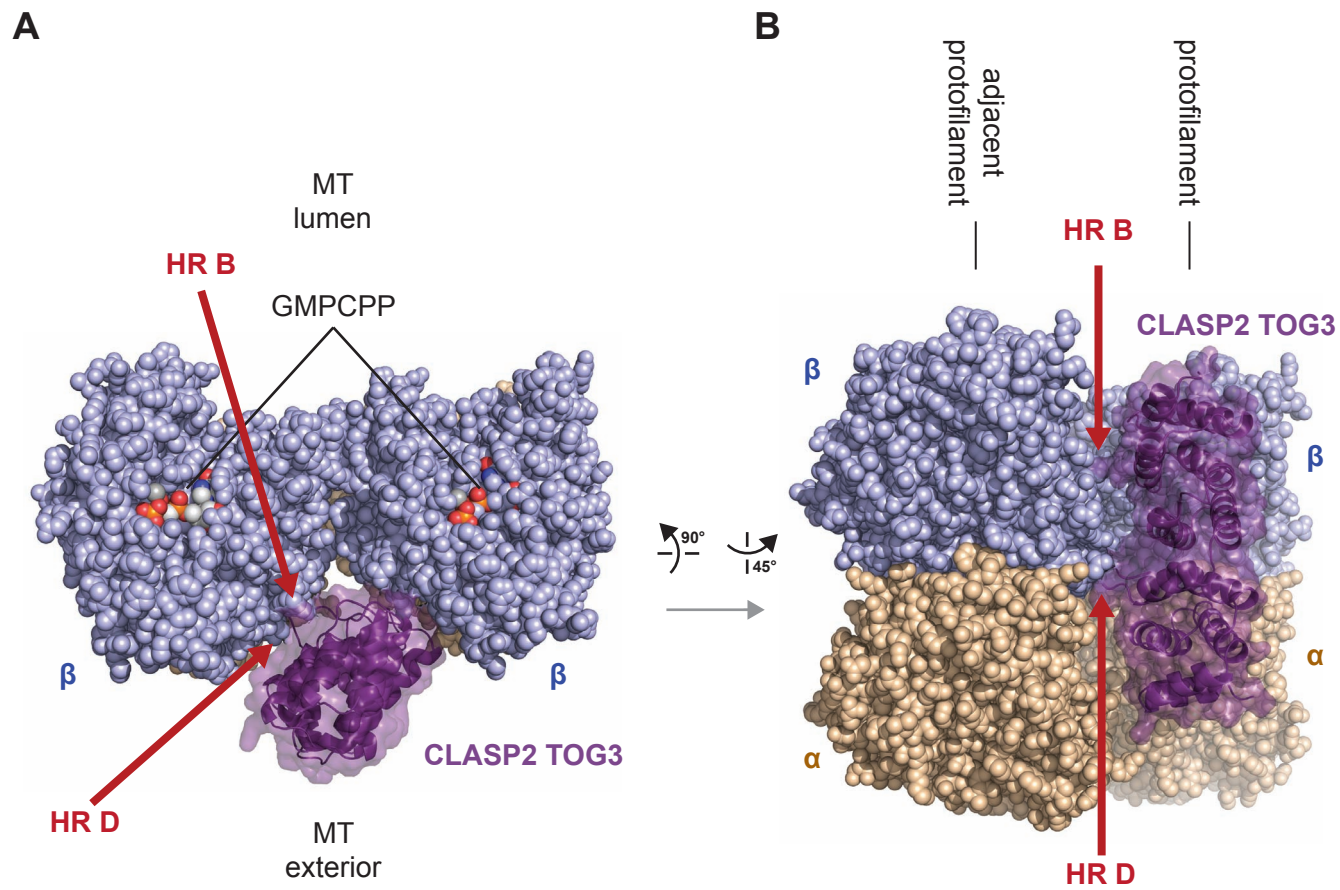

Source: https://www.biorxiv.org/content/10.1101/479766v1.full.pdf
